# Supplementary material
Source: PubMed Central journal article supplement (PMC8600973)
Supplement: NIHMS1754303-supplement-supinfo.pdf [file NIHMS1754303-supplement-supinfo.pdf]

## Supporting Information

### **DNA damage checkpoint activation affects peptidoglycan synthesis and late divisome components in *Bacillus subtilis***

Emily A. Masser, Peter E. Burby, Wayne D. Hawkins, Brooke R. Gustafson, Justin S. Lenhart and Lyle A. Simmons\*

Department of Molecular, Cellular, and Developmental Biology, University of Michigan, Ann Arbor, MI 48109, United States.

\*Corresponding author

LAS: Department of Molecular, Cellular, and Developmental Biology, University of Michigan, Ann Arbor, Michigan 48109-1055, United States. Phone: (734) 763-7142, Fax: (734) 647-0884 E-mail: [lasimm@umich.edu](mailto:lasimm@umich.edu)

Running Title: Regulation of the DNA damage checkpoint

Key words: YneA, DNA damage checkpoint, FtsW, cell division.

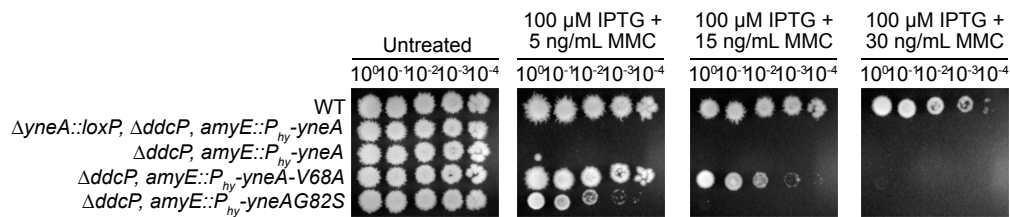

**Figure S1. The *yneA* variants are recessive to native *yneA* in the presence of increasing concentrations of DNA damage.** Spot titer assay using *B. subtilis* strains WT (PY79),  $\Delta yneA::loxP \Delta ddcP amyE::P_{hy}-yneA$  (EAM48),  $\Delta ddcP amyE::P_{hy}-yneA$  (PEB681),  $\Delta ddcP amyE::P_{hy}-yneA-V68A$  (EAM57) and  $\Delta ddcP amyE::P_{hy}-yneA-G82S$  (EAM58) spotted on the indicated media.

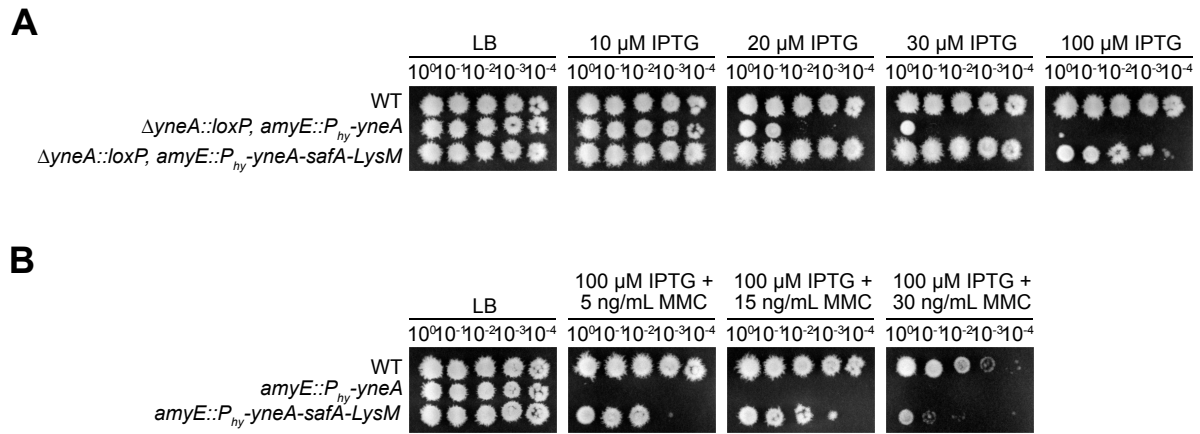

**Figure S2. YneA LysM domain swap fails in checkpoint activation.** Spot titer assay using *B. subtilis* strains WT (PY79), **(A)**  $\Delta yneA::loxP$   $amyE::P_{hy-yneA}$  (EAM46) and  $\Delta yneA::loxP$   $amyE::P_{hy-yneA-safA-LysM}$  (EAM80) **(B)**  $amyE::P_{hy-yneA}$  (PEB677) and  $amyE::P_{hy-yneA-safA-LysM}$  (EAM82) spotted on the indicated media.

1 mM IPTG

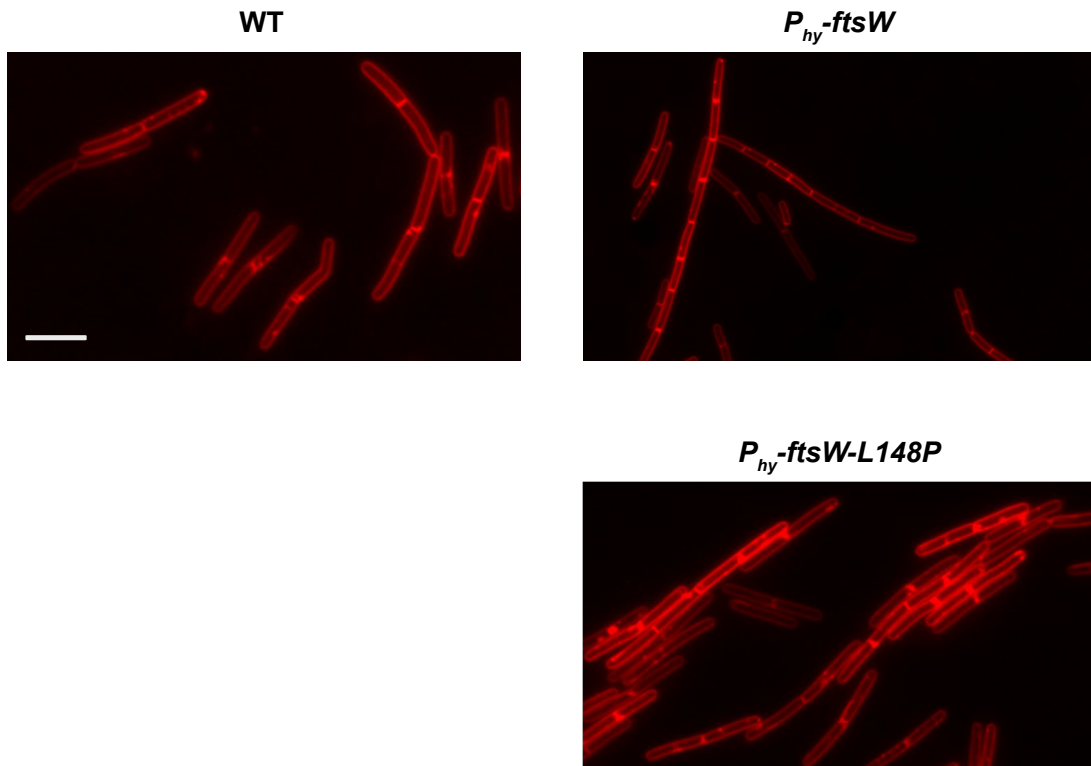

**Figure S3.** Representative images of WT, cells expressing FtsW or FtsW-L148P. The white bar corresponds to 10  $\mu\text{m}$ .

1 mM IPTG + 100 ng/mL MMC

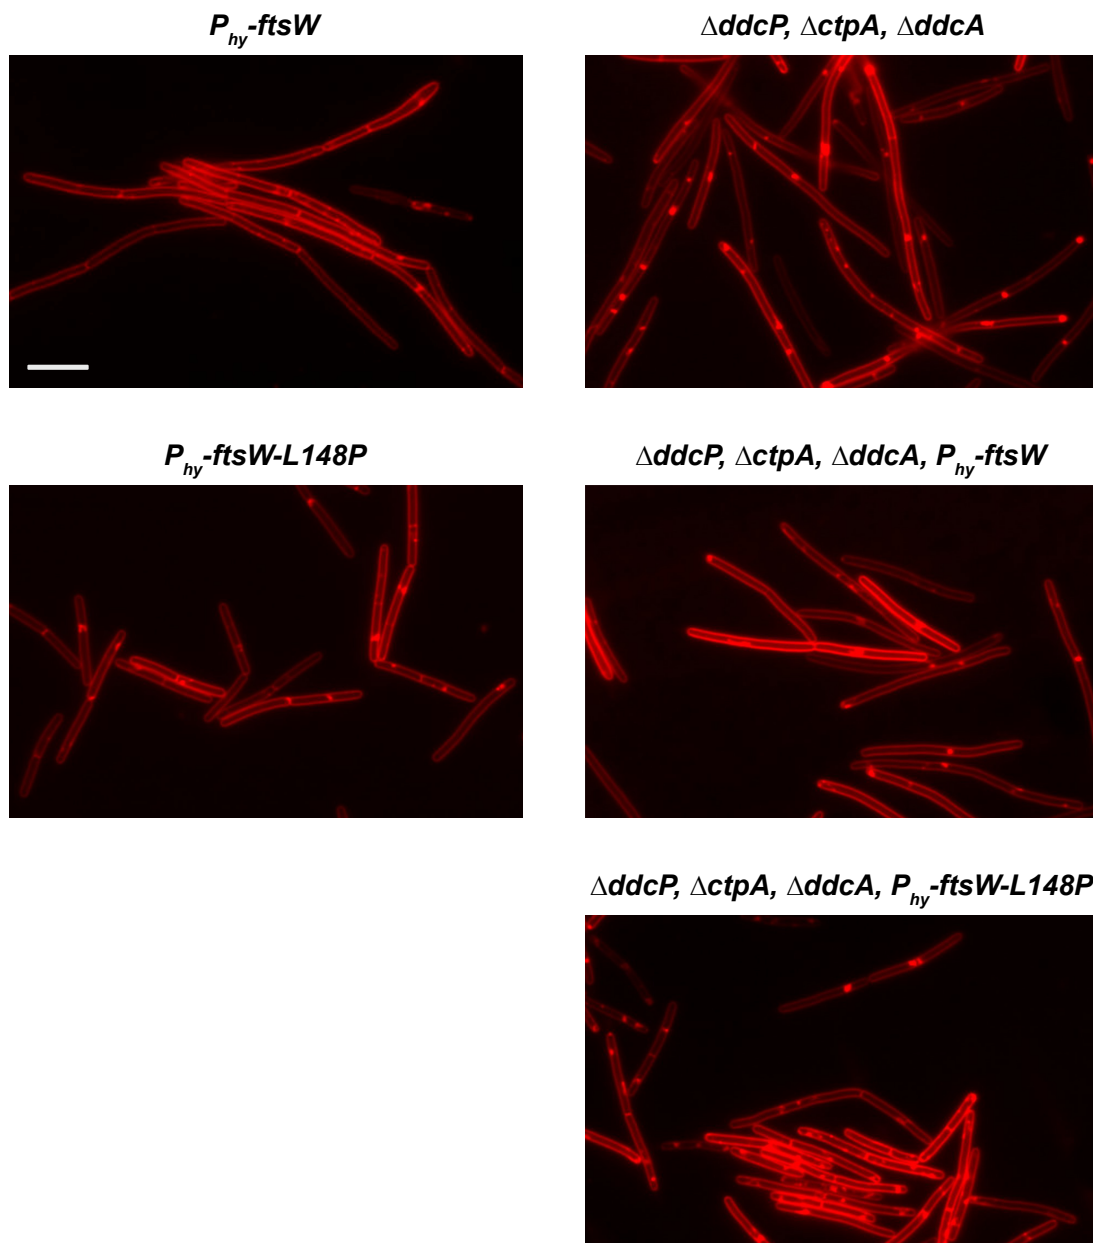

**Figure S4.** Representative images of cells expressing FtsW or FtsW-L148P under the condition indicated. The white bar corresponds to 10  $\mu$ m.

## Supporting Tables

**Table S1. Other mutations identified in the sequenced strains that occurred outside of *ftsW*.**

| <b>Gene Annotation</b>                | <b>Mutation</b>    | <b>Count</b> |
|---------------------------------------|--------------------|--------------|
| Putative transporter <i>ybxG</i>      | I18V (ATC → GTC)   | 1            |
| Cystathionine beta-lyase <i>metC</i>  | D192N (GAT → AAT)  | 1            |
| Putative membrane protein <i>yerD</i> | M92I (ATG → ATA)   | 1            |
| Ribulokinase                          | M108V (ATG → GTG)  | 1            |
| Histidyl-tRNA synthetase              | G297S (GGC → AGC)  | 1            |
| Polyketide synthase <i>pksL</i>       | Q3722R (CAG → CGG) | 1            |

Count refers to the number of occurrences observed in the 25 different sequenced lines.

**Table S2. Cell lengths of the strains indicated in Fig. 5A.**

| <b>Strain</b> | <b>Genotype</b>                        | <b>Cell length (mean <math>\pm</math> sd)</b> |
|---------------|----------------------------------------|-----------------------------------------------|
| PY79          | WT                                     | 5.66 $\pm$ 1.26 (n = 895)                     |
| EAM72         | <i>amyE::P<sub>hy</sub>-ftsW</i>       | 4.69 $\pm$ 1.01 (n = 800)                     |
| EAM69         | <i>amyE::P<sub>hy</sub>-ftsW-L148P</i> | 6 $\pm$ 1.19 (n = 519)                        |

Strains were measured after growing in the presence of 1 mM IPTG for approximately 1.5 hours. The number of cells scored in each distribution is represented by “n=” and the genotype of each strain is indicated.

**Table S3. Cell lengths of the strains indicated in Fig. 5B.**

| <b>Strain</b> | <b>Genotype</b>                                                                                             | <b>Cell length (mean <math>\pm</math> sd)</b> |
|---------------|-------------------------------------------------------------------------------------------------------------|-----------------------------------------------|
| EAM72         | <i>amyE::P<sub>hy</sub>-ftsW</i>                                                                            | 10.15 $\pm$ 2.97 (n = 2277)                   |
| EAM69         | <i>amyE::P<sub>hy</sub>-ftsW-L148P</i>                                                                      | 7.27 $\pm$ 1.64 (n = 2549)                    |
| PEB639        | $\Delta$ <i>ddcP</i> , $\Delta$ <i>ctpA</i> , $\Delta$ <i>ddcA</i>                                          | 16.5 $\pm$ 5.21 (n = 592)                     |
| EAM73         | $\Delta$ <i>ddcP</i> , $\Delta$ <i>ctpA</i> , $\Delta$ <i>ddcA</i> , <i>amyE::P<sub>hy</sub>-ftsW</i>       | 15.86 $\pm$ 4.89 (n = 428)                    |
| EAM65         | $\Delta$ <i>ddcP</i> , $\Delta$ <i>ctpA</i> , $\Delta$ <i>ddcA</i> , <i>amyE::P<sub>hy</sub>-ftsW-L148P</i> | 8.81 $\pm$ 2.43 (n = 839)                     |

Strains were measured after growing in the presence of 1 mM IPTG and 100 ng/mL MMC for approximately 1.5 hours. The number of cells scored in each distribution is indicated as “n=” and the genotype of each strain is also indicated.



**Supporting Table S4. Plasmids used in this study.**

| <b>Plasmid number</b> | <b>Plasmid name</b>                                                 | <b>Reference/Source</b>      |
|-----------------------|---------------------------------------------------------------------|------------------------------|
| <b>pEM1</b>           | pPB194-amyE:: <i>P<sub>hy</sub>-yneA-V68A-spec<sup>R</sup></i>      | This study                   |
| <b>pEM2</b>           | pPB194-amyE:: <i>P<sub>hy</sub>-yneA-G10D-spec<sup>R</sup></i>      | This study                   |
| <b>pEM4</b>           | pPB194-amyE:: <i>P<sub>hy</sub>-yneA-G82S-spec<sup>R</sup></i>      | This study                   |
| <b>pEM5</b>           | pPB194-amyE:: <i>P<sub>hy</sub>-yneA-Δ5-spec<sup>R</sup></i>        | This study                   |
| <b>pEM6</b>           | pPB194-amyE:: <i>P<sub>hy</sub>-yneA-Δ10-spec<sup>R</sup></i>       | This study                   |
| <b>pEM7</b>           | pPB194-amyE:: <i>P<sub>hy</sub>-yneA-Δ15-spec<sup>R</sup></i>       | This study                   |
| <b>pEM13</b>          | pPB194-amyE:: <i>P<sub>hy</sub>-ftsW-spec<sup>R</sup></i>           | This study                   |
| <b>pEM26</b>          | pPB194-amyE:: <i>P<sub>hy</sub>-yneA-safA-LysM-spec<sup>R</sup></i> | This study                   |
| <b>pPB47</b>          | pPB47                                                               | (Burby, Simmons et al. 2018) |
| <b>pPB192</b>         | pPB47-amyE:: <i>P<sub>xyI</sub>-yneA-cam<sup>R</sup></i>            | (Burby, Simmons et al. 2019) |
| <b>pPB194</b>         | pPB194                                                              | (Burby, Simmons et al. 2018) |
| <b>pPB185</b>         | pPB185                                                              | (Burby, Simmons et al. 2018) |

**Supporting Table S5. Oligonucleotides used in this study.**

| <b>Primer name</b> | <b>Sequence</b>                                                                   |
|--------------------|-----------------------------------------------------------------------------------|
| oEAM20             | cttagtcgactaaggaggatatacatatgagtaaagaatctattatTTTTgtcg                            |
| oPEB857            | gaattagcttgcacgaggctagcttactatcttacagttgctaattcatatg                              |
| oPEB3F             | gctagccgcacgcaagctaattcg                                                          |
| oPEB259            | atgtataacctcttagtcgactaagcttaattgttatccgctcacaattacacacattatgccacacc<br>ttgtagata |
| oPEB866            | tttatgcagcaatggcaagaac                                                            |
| oPEB867            | gccgactcaaacatcaaatcttac                                                          |
| oEAM21             | gaattagcttgcacgaggctagcttattcatatgcatcctgatgcttcttttc                             |
| oEAM22             | gaattagcttgcacgaggctagcttaatgcttcttttcaatgggatcactaac                             |
| oEAM23             | gaattagcttgcacgaggctagcttattgggatcactaactcatcacc                                  |
| oEAM28             | cttagtcgactaaggaggatatacatatgcggcagctgtttgcttaattg                                |
| oEAM29             | gaattagcttgcacgaggctagcttattacagataaacagttttttgagctgtttc                          |
| oEAM42             | tcccggtgaaggtaaggacaaggccaaatgaaccgggtcaagaccgaga                                 |
| oEAM43             | gttgtaaaacgacggccgaattcttagttatcaattttcatcttcttttagcagct                          |
| oEAM44             | tcccggtgaaggtaaggacaaggccaaatggagttgtcattggattattaattg                            |
| oEAM45             | gttgtaaaacgacggccgaattcttagttactaagcggatattgcagctttgat                            |
| oEAM46             | tcccggtgaaggtaaggacaaggccaaatgagtatgaaaaataaactgaaaaactt                          |
| oEAM47             | gttgtaaaacgacggccgaattcttagttattaccacctctgatgttcgtcttc                            |
| oEAM48             | tcccggtgaaggtaaggacaaggccaaatgaattttccagggaacgaacg                                |
| oEAM49             | gttgtaaaacgacggccgaattcttagttactactgtcttcttctccacatt                              |
| oEAM50             | tcccggtgaaggtaaggacaaggccaaatgagcaatttagcttaccacca                                |
| oEAM51             | gttgtaaaacgacggccgaattcttagttatcattctgtatgttttactttttatc                          |
| oEAM52             | tcccggtgaaggtaaggacaaggccaaatgcggcagctgtttgcttaatt                                |
| oEAM53             | gttgtaaaacgacggccgaattcttagttattacagataaacagttttttgagctg                          |
| oEAM54             | tcccggtgaaggtaaggacaaggccaaatgccattaacgccaaatgatattc                              |
| oEAM55             | gttgtaaaacgacggccgaattcttagttattattcttttctcaatacagcg                              |
| oEAM56             | tcccggtgaaggtaaggacaaggccaaatgcaaaaaagaataaatttatgaatagag                         |
| oEAM57             | gttgtaaaacgacggccgaattcttagttattaatcaggatttttaacttaacctg                          |
| oPEB1021           | attatgccgcacatctgtccaact                                                          |
| oPEB1022           | gcaaggcgattaagttgggtaa                                                            |
| oPEB1024           | ttctcgccgatgtactggaaac                                                            |
| oPEB1025           | tggttaactatgcggcatcaga                                                            |
| oPEB1034           | ctagagggtgaaggtaaggacaaggccaaatgagtaaagaatctattatTTTTgtcgg                        |
| oPEB1035           | gtactgagagtgaccatattacttagttactatcttacagttgctaattcatatgca                         |
| oPEB1041           | atcccggtgaaggtaaggacaaggccaaatgaaacggcaattaaaactgtttttattg                        |
| oPEB1042           | gttgtaaaacgacggccgaattcttagttattacatttcttttctcagtttcaattgc                        |
| oPEB1058           | tcccggtgaaggtaaggacaaggccaaatgagtaaagaatctattatTTTTgtcgg                          |
| oPEB1059           | gttgtaaaacgacggccgaattcttagttactatcttacagttgctaattcatatgca                        |
| oPEB1070           | tctagagggtgaaggtaaggacaaggccaaatgaaccgggtcaagaccgaga                              |
| oPEB1071           | actgagagtgaccatattacttagttatcaattttcatcttcttttagcagct                             |
| oPEB1072           | tagagggtgaaggtaaggacaaggccaaatggagttgtcattggattattaattg                           |
| oPEB1073           | ttgtactgagagtgaccatattacttagttactaagcggatattgcagctttgat                           |
| oPEB1074           | tagagggtgaaggtaaggacaaggccaaatgagtatgaaaaataaactgaaaaactt                         |

oPEB1075 ttgtactgagagtgcacatattacttagttattaccacctctgatgttcgcttc  
oPEB1092 ctgaggggtgaaggtaaggacaaggccaattgaatccccagggaaacgaacg  
oPEB1093 actgagagtgcacatattacttagttactacttgctcttctctccacatt  
oPEB1094 agaggggtgaaggtaaggacaaggccaatgagcaatttagcttaccaacca  
oPEB1095 actgagagtgcacatattacttagttatcattcctgtatgttttcactttttatc  
oPEB1096 agaggggtgaaggtaaggacaaggccaatgcggcagctgtttgctttaatt  
oPEB1097 actgagagtgcacatattacttagttattacagataaacagttttttgagctg  
oPEB1098 tagaggggtgaaggtaaggacaaggccaatgccattaacgccaatgatattc  
oPEB1099 tactgagagtgcacatattacttagttattattcctttcctcaaatacagcg  
oPEB1100 tagaggggtgaaggtaaggacaaggccaatgccaaaaagaataaattatgaatagag  
oPEB1101 ttgtactgagagtgcacatattacttagttattaatcaggattttaaaacttaaccttg  
oPEB1102 agaggggtgaaggtaaggacaaggccaatgcagatcaatttaacagccgt  
oPEB1103 gtactgagagtgcacatattacttagttattaattgtttttcaatggatgatgagtt  
oPEB1104 ctgaggggtgaaggtaaggacaaggccaatgcttgctgataaagtaaagctttc  
oPEB1105 ttgtactgagagtgcacatattacttagttatcaatcataaagcttgctgcaaaaaacg  
oPEB1108 tagaggggtgaaggtaaggacaaggccaatgaaacggcaattaaaactgtttttattg  
oPEB1109 gtactgagagtgcacatattacttagttattacatttctttttcagtgttcaattgc  
oPEB1110 gatccccggtgaaggtaaggacaaggccaatgcttgctgataaagtaaagctttc  
oPEB1111 tgtaaaacgacggccgaattcttagttatcaatcataaagcttgctgcaaaaaacg  
oPEB1112 gatccccggtgaaggtaaggacaaggccaatgcagatcaatttaacagccgt  
oPEB1113 gttgtaaaaacgacggccgaattcttagttattaattgtttttcaatggatgatgagtt

---

**Supporting Table S6. Strains used in this study.**

| <b>Strain</b> | <b>Genotype</b>                                                               | <b>Reference/Source</b>         |
|---------------|-------------------------------------------------------------------------------|---------------------------------|
| <b>PY79</b>   | Prototroph Sp $\beta^{\circ}$                                                 | (Youngman, Perkins et al. 1984) |
| <b>PEB324</b> | $\Delta ddcP$                                                                 | (Burby, Simmons et al. 2018)    |
| <b>PEB439</b> | $\Delta yneA::loxP$                                                           | (Burby, Simmons et al. 2018)    |
| <b>PEB441</b> | $\Delta ddcP, \Delta yneA::loxP$                                              | (Burby, Simmons et al. 2018)    |
| <b>PEB639</b> | $\Delta ddcP, \Delta ctpA, \Delta ddcA$                                       | (Burby, Simmons et al. 2019)    |
| <b>PEB643</b> | $\Delta ddcP, \Delta ctpA, \Delta ddcA, \Delta yneA::loxP$                    | (Burby, Simmons et al. 2019)    |
| <b>PEB677</b> | $amyE::P_{hy-yneA}$                                                           | (Burby, Simmons et al. 2018)    |
| <b>PEB681</b> | $\Delta ddcP, amyE::P_{hy-yneA}$                                              | (Burby, Simmons et al. 2018)    |
| <b>PEB844</b> | $\Delta ddcP, \Delta ctpA, \Delta ddcA, amyE::P_{hy-yneA}$                    | This study                      |
| <b>PEB852</b> | $\Delta ddcP, \Delta ctpA, \Delta ddcA, amyE::P_{xyI-yneA}$                   | This study                      |
| <b>EAM46</b>  | $\Delta yneA::loxP, amyE::P_{hy-yneA}$                                        | This study                      |
| <b>EAM48</b>  | $\Delta ddcP, \Delta yneA::loxP, amyE::P_{hy-yneA}$                           | This study                      |
| <b>EAM49</b>  | $\Delta yneA::loxP, amyE::P_{hy-yneA-V68A}$                                   | This study                      |
| <b>EAM50</b>  | $\Delta yneA::loxP, amyE::P_{hy-yneA-G10D}$                                   | This study                      |
| <b>EAM52</b>  | $\Delta yneA::loxP, amyE::P_{hy-yneA-G82S}$                                   | This study                      |
| <b>EAM53</b>  | $\Delta yneA::loxP, amyE::P_{hy-yneA\Delta 5}$                                | This study                      |
| <b>EAM54</b>  | $\Delta yneA::loxP, amyE::P_{hy-yneA\Delta 10}$                               | This study                      |
| <b>EAM55</b>  | $\Delta yneA::loxP, amyE::P_{hy-yneA\Delta 15}$                               | This study                      |
| <b>EAM56</b>  | $\Delta ddcP, \Delta ctpA, \Delta ddcA, \Delta yneA::loxP, amyE::P_{hy-yneA}$ | This study                      |
| <b>EAM57</b>  | $\Delta ddcP, amyE::P_{hy-yneA-V68A}$                                         | This study                      |
| <b>EAM58</b>  | $\Delta ddcP, amyE::P_{hy-yneA-G82S}$                                         | This study                      |
| <b>EAM63</b>  | $\Delta ddcP, \Delta yneA::loxP, amyE::P_{hy-yneA-G10D}$                      | This study                      |
| <b>EAM64</b>  | $\Delta ddcP, \Delta ctpA, \Delta ddcA, amyE::P_{hy-ftsW-A99V}$               | This study                      |
| <b>EAM65</b>  | $\Delta ddcP, \Delta ctpA, \Delta ddcA, amyE::P_{hy-ftsW-L148P}$              | This study                      |
| <b>EAM66</b>  | $\Delta ddcP, \Delta ctpA, \Delta ddcA, amyE::P_{hy-ftsW-P158L}$              | This study                      |
| <b>EAM67</b>  | $\Delta ddcP, \Delta ctpA, \Delta ddcA, amyE::P_{hy-ftsW-P158S}$              | This study                      |
| <b>EAM68</b>  | $amyE::P_{hy-ftsW-A99V}$                                                      | This study                      |
| <b>EAM69</b>  | $amyE::P_{hy-ftsW-L148P}$                                                     | This study                      |
| <b>EAM70</b>  | $amyE::P_{hy-ftsW-P158L}$                                                     | This study                      |
| <b>EAM71</b>  | $amyE::P_{hy-ftsW-P158S}$                                                     | This study                      |
| <b>EAM72</b>  | $amyE::P_{hy-ftsW}$                                                           | This study                      |
| <b>EAM73</b>  | $\Delta ddcP, \Delta ctpA, \Delta ddcA, amyE::P_{hy-ftsW}$                    | This study                      |
| <b>EAM78</b>  | $\Delta ddcP, \Delta yneA::loxP, amyE::P_{hy-yneA-V68A}$                      | This study                      |

|              |                                                             |            |
|--------------|-------------------------------------------------------------|------------|
| <b>EAM79</b> | $\Delta ddcP, \Delta yneA::loxP, amyE::P_{hy-yneA-G82S}$    | This study |
| <b>EAM80</b> | $\Delta yneA::loxP, amyE::P_{hy-yneA-safA-LysM}$            | This study |
| <b>EAM82</b> | $amyE::P_{hy-yneA-safA-LysM}$                               | This study |
| <b>EAM83</b> | $\Delta ddcP, \Delta yneA:loxP, amyE::P_{hy-yneA\Delta 5}$  | This study |
| <b>EAM84</b> | $\Delta ddcP, \Delta yneA:loxP, amyE::P_{hy-yneA\Delta 10}$ | This study |
| <b>EAM85</b> | $\Delta ddcP, \Delta yneA:loxP, amyE::P_{hy-yneA\Delta 15}$ | This study |

---

**Supporting Table S7. Plasmid list for bacterial two-hybrid assay**

| <b>Plasmid</b> | <b>Vector</b> | <b>Description</b>    | <b>Primers<sup>a</sup></b> |
|----------------|---------------|-----------------------|----------------------------|
| pPB275         | pKT25         | YneA                  | oPEB1058 and 1059          |
| pPB291         | pUT18C        | DivIB                 | oPEB1070 and 1071          |
| pPB292         | pUT18C        | EzrA                  | oPEB1072 and 1073          |
| pPB293         | pUT18C        | SepF                  | oPEB1074 and 1075          |
| pPB296         | pUT18C        | DivIC                 | oPEB1092 and 1093          |
| pPB297         | pUT18C        | FtsL                  | oPEB1094 and 1095          |
| pPB298         | pUT18C        | FtsW                  | oPEB1096 and 1097          |
| pEM25          | pUT18C        | FtsW-L148P            | oPEB1096 and 1097          |
| pPB299         | pUT18C        | DivIVA                | oPEB1098 and 1099          |
| pPB300         | pUT18C        | Pbp2b ( <i>pbpB</i> ) | oPEB1100 and 1101          |
| pPB301         | pUT18C        | Pbp1 ( <i>ponA</i> )  | oPEB1102 and 1103          |
| pPB302         | pUT18C        | GpsB                  | oPEB1104 and 1105          |
| pPB303         | pUT18C        | CtpA-S297A            | oPEB1108 and 1109          |
| pPB267         | pUT18C        | YneA                  | oPEB1034 and 1035          |
| pEM16          | pKT25         | DivIB                 | oEAM42 and 43              |
| pEM17          | pKT25         | EzrA                  | oEAM44 and 45              |
| pEM18          | pKT25         | SepF                  | oEAM46 and 47              |
| pEM19          | pKT25         | DivIC                 | oEAM48 and 49              |
| pEM20          | pKT25         | FtsL                  | oEAM50 and 51              |
| pEM21          | pKT25         | FtsW                  | oEAM52 and 53              |
| pEM22          | pKT25         | FtsW-L148P            | oEAM52 and 53              |
| pEM23          | pKT25         | DivIVA                | oEAM54 and 55              |
| pEM24          | pKT25         | Pbp2b ( <i>pbpB</i> ) | oEAM56 and 57              |
| pPB305         | pKT25         | Pbp1 ( <i>ponA</i> )  | oPEB1112 and 1113          |
| pPB304         | pKT25         | GpsB                  | oPEB1110 and 1111          |
| pPB271         | pKT25         | CtpA-S297A            | oPEB1041 and 1042          |

<sup>a</sup>Primer pairs used to amplify the gene fragments are provided (see Supporting Table 2 for primer sequences).

## Supporting Experimental Procedures

### *Individual strain construction*

**PEB844** ( $\Delta ddcP$ ,  $\Delta ctpA$ ,  $\Delta ddcA$ ,  $amyE::P_{hy-yneA}$ ): PEB639 ( $\Delta ddcP$ ,  $\Delta ctpA$ ,  $\Delta ddcA$ ) was transformed with plasmid pPB194.

**PEB852** ( $\Delta ddcP$ ,  $\Delta ctpA$ ,  $\Delta ddcA$ ,  $amyE::P_{xyl-yneA}$ ): PEB639 ( $\Delta ddcP$ ,  $\Delta ctpA$ ,  $\Delta ddcA$ ) was transformed with plasmid pPB192.

**EAM46** ( $\Delta yneA::loxP$ ,  $amyE::P_{hy-yneA}$ ): PEB439 ( $\Delta yneA::loxP$ ) was transformed with genomic DNA isolated from PEB677 ( $amyE::P_{hy-yneA}$ ).

**EAM48** ( $\Delta ddcP$ ,  $\Delta yneA::loxP$ ,  $amyE::P_{hy-yneA}$ ): PEB441 ( $\Delta ddcP$ ,  $\Delta yneA::loxP$ ) was transformed with genomic DNA isolated from PEB677 ( $amyE::P_{hy-yneA}$ ).

**EAM49** ( $\Delta yneA::loxP$ ,  $amyE::P_{hy-yneA-V68A}$ ): PEB439 ( $\Delta yneA::loxP$ ) was transformed with plasmid pEM1.

**EAM50** ( $\Delta yneA::loxP$ ,  $amyE::P_{hy-yneA-G10D}$ ): PEB439 ( $\Delta yneA::loxP$ ) was transformed with plasmid pEM2.

**EAM52** ( $\Delta yneA::loxP$ ,  $amyE::P_{hy-yneA-G82S}$ ): PEB439 ( $\Delta yneA::loxP$ ) was transformed with plasmid pEM4.

**EAM53** ( $\Delta yneA::loxP$ ,  $amyE::P_{hy-yneA\Delta 5}$ ): PEB439 ( $\Delta yneA::loxP$ ) was transformed with plasmid pEM5.

**EAM54** ( $\Delta yneA::loxP$ ,  $amyE::P_{hy-yneA\Delta 10}$ ): PEB439 ( $\Delta yneA::loxP$ ) was transformed with plasmid pEM6.

**EAM55** ( $\Delta yneA::loxP$ ,  $amyE::P_{hy-yneA\Delta 15}$ ): PEB439 ( $\Delta yneA::loxP$ ) was transformed with plasmid pEM7.

**EAM56** ( $\Delta ddcP$ ,  $\Delta ctpA$ ,  $\Delta ddcA$ ,  $\Delta yneA::loxP$ ,  $amyE::P_{hy-yneA}$ ): PEB643 ( $\Delta ddcP$ ,  $\Delta ctpA$ ,  $\Delta ddcA$ ,  $\Delta yneA::loxP$ ) was transformed with genomic DNA isolated from PEB677 ( $amyE::P_{hy-yneA}$ ).

**EAM57** ( $\Delta ddcP$ ,  $amyE::P_{hy-yneA-V68A}$ ): PEB324 ( $\Delta ddcP$ ) was transformed with genomic DNA isolated from EAM49 ( $\Delta yneA::loxP$ ,  $amyE::P_{hy-yneA-V68A}$ ).

**EAM58** ( $\Delta ddcP$ ,  $amyE::P_{hy-yneA-G82S}$ ): PEB324 ( $\Delta ddcP$ ) was transformed with genomic DNA isolated from EAM52 ( $\Delta yneA::loxP$ ,  $amyE::P_{hy-yneA-G82S}$ ).

**EAM63** ( $\Delta ddcP$ ,  $\Delta yneA::loxP$ ,  $amyE::P_{hy}-yneA-G10D$ ): PEB324 ( $\Delta ddcP$ ) was transformed with genomic DNA isolated from EAM50 ( $\Delta yneA::loxP$ ,  $amyE::P_{hy}-yneA-G10D$ ).

**EAM64** ( $\Delta ddcP$ ,  $\Delta ctpA$ ,  $\Delta ddcA$ ,  $amyE::P_{hy}-ftsW-A99V$ ): The ORF of *ftsW-A99V* was PCR amplified using oEAM28 and oEAM29 primers. Genomic DNA isolated from WDH25 (*ftsW-A99V*) was used as the template. pPB194 was PCR amplified using oPEB3F and oPEB259 primers. These two PCR products were used in a Gibson assembly reaction to generate a plasmid to integrate *ftsW-A99V* under the control of  $P_{hy}$  at the *amyE* locus (*ftsW-A99V*-pPB194). Clones were verified by Sanger sequencing with oPEB866 and oPEB867. PEB639 ( $\Delta ddcP$ ,  $\Delta ctpA$ ,  $\Delta ddcA$ ) was transformed with this plasmid (*ftsW-A99V*-pPB194).

**EAM65** ( $\Delta ddcP$ ,  $\Delta ctpA$ ,  $\Delta ddcA$ ,  $amyE::P_{hy}-ftsW-L148P$ ): The ORF of *ftsW-L148P* was PCR amplified using oEAM28 and oEAM29 primers. Genomic DNA isolated from WDH30 (*ftsW-L148P*) was used as the template. pPB194 was PCR amplified using oPEB3F and oPEB259 primers. These two PCR products were used in a Gibson assembly reaction to generate a plasmid to integrate *ftsW-L148P* under the control of  $P_{hy}$  at the *amyE* locus (*ftsW-L148P*-pPB194). Clones were verified by Sanger sequencing with oPEB866 and oPEB867. PEB639 ( $\Delta ddcP$ ,  $\Delta ctpA$ ,  $\Delta ddcA$ ) was transformed with this plasmid (*ftsW-L148P*-pPB194).

**EAM66** ( $\Delta ddcP$ ,  $\Delta ctpA$ ,  $\Delta ddcA$ ,  $amyE::P_{hy}-ftsW-P158L$ ): The ORF of *ftsW-P158L* was PCR amplified using oEAM28 and oEAM29 primers. Genomic DNA isolated from WDH19 (*ftsW-P158L*) was used as the template. pPB194 was PCR amplified using oPEB3F and oPEB259 primers. These two PCR products were used in a Gibson assembly reaction to generate a plasmid to integrate *ftsW-P158L* under the control of  $P_{hy}$  at the *amyE* locus (*ftsW-P158L*-pPB194). Clones were verified by Sanger sequencing with oPEB866 and oPEB867. PEB639 ( $\Delta ddcP$ ,  $\Delta ctpA$ ,  $\Delta ddcA$ ) was transformed with this plasmid (*ftsW-P158L*-pPB194).

**EAM67** ( $\Delta ddcP$ ,  $\Delta ctpA$ ,  $\Delta ddcA$ ,  $amyE::P_{hy}-ftsW-P158S$ ): The ORF of *ftsW-P158S* was PCR amplified using oEAM28 and oEAM29 primers. Genomic DNA isolated from WDH32 (*ftsW-P158S*) was used as the template. pPB194 was PCR amplified using oPEB3F and oPEB259 primers. These two PCR products were used in a Gibson assembly reaction to generate a plasmid to integrate *ftsW-P158S* under the control of  $P_{hy}$  at the *amyE* locus (*ftsW-P158S*-pPB194). Clones were verified by Sanger sequencing with oPEB866 and oPEB867. PEB639 ( $\Delta ddcP$ ,  $\Delta ctpA$ ,  $\Delta ddcA$ ) was transformed with this plasmid (*ftsW-P158S*-pPB194).

**EAM68** ( $amyE::P_{hy}-ftsW-A99V$ ): The ORF of *ftsW-A99V* was PCR amplified using oEAM28 and oEAM29 primers. Genomic DNA isolated from WDH25 (*ftsW-A99V*) was used as the template. pPB194 was PCR amplified using oPEB3F and oPEB259 primers. These two PCR products were used in a Gibson assembly reaction to generate a plasmid to integrate *ftsW-A99V* under the control of  $P_{hy}$  at the *amyE* locus (*ftsW-*



A99V-pPB194). Clones were verified by Sanger sequencing with oPEB866 and oPEB867. PY79 was transformed with this plasmid (*ftsW-A99V-pPB194*).

**EAM69** (*amyE::P<sub>hy</sub>-ftsW-L148P*): The ORF of *ftsW-L148P* was PCR amplified using oEAM28 and oEAM29 primers. Genomic DNA isolated from WDH30 (*ftsW-L148P*) was used as the template. pPB194 was PCR amplified using oPEB3F and oPEB259 primers. These two PCR products were used in a Gibson assembly reaction to generate a plasmid to integrate *ftsW-L148P* under the control of P<sub>hy</sub> at the *amyE* locus (*ftsW-L148P-pPB194*). Clones were verified by Sanger sequencing with oPEB866 and oPEB867. PY79 was transformed with this plasmid (*ftsW-L148P-pPB194*).

**EAM70** (*amyE::P<sub>hy</sub>-ftsW-P158L*): The ORF of *ftsW-P158L* was PCR amplified using oEAM28 and oEAM29 primers. Genomic DNA isolated from WDH19 (*ftsW-P158L*) was used as the template. pPB194 was PCR amplified using oPEB3F and oPEB259 primers. These two PCR products were used in a Gibson assembly reaction to generate a plasmid to integrate *ftsW-P158L* under the control of P<sub>hy</sub> at the *amyE* locus (*ftsW-P158L-pPB194*). Clones were verified by Sanger sequencing with oPEB866 and oPEB867. PY79 was transformed with this plasmid (*ftsW-P158L-pPB194*).

**EAM71** (*amyE::P<sub>hy</sub>-ftsW-P158S*): The ORF of *ftsW-P158S* was PCR amplified using oEAM28 and oEAM29 primers. Genomic DNA isolated from WDH32 (*ftsW-P158S*) was used as the template. pPB194 was PCR amplified using oPEB3F and oPEB259 primers. These two PCR products were used in a Gibson assembly reaction to generate a plasmid to integrate *ftsW-P158S* under the control of P<sub>hy</sub> at the *amyE* locus (*ftsW-P158S-pPB194*). Clones were verified by Sanger sequencing with oPEB866 and oPEB867. PY79 was transformed with this plasmid (*ftsW-P158S-pPB194*).

**EAM72** (*amyE::P<sub>hy</sub>-ftsW*): PY79 was transformed with plasmid pEM13.

**EAM73** ( $\Delta ddcP$ ,  $\Delta ctpA$ ,  $\Delta ddcA$ , *amyE::P<sub>hy</sub>-ftsW*): PEB639 ( $\Delta ddcP$ ,  $\Delta ctpA$ ,  $\Delta ddcA$ ) was transformed with plasmid pEM13.

**EAM78** ( $\Delta ddcP$ ,  $\Delta yneA::loxP$ , *amyE::P<sub>hy</sub>-yneA-V68A*): PEB441 ( $\Delta ddcP$ ,  $\Delta yneA::loxP$ ) was transformed with genomic DNA isolated from EAM49 ( $\Delta yneA::loxP$ , *amyE::P<sub>hy</sub>-yneA-V68A*).

**EAM79** ( $\Delta ddcP$ ,  $\Delta yneA::loxP$ , *amyE::P<sub>hy</sub>-yneA-G82S*): PEB441 ( $\Delta ddcP$ ,  $\Delta yneA::loxP$ ) was transformed with genomic DNA isolated from EAM52 ( $\Delta yneA::loxP$ , *amyE::P<sub>hy</sub>-yneA-G82S*).

**EAM80** ( $\Delta yneA::loxP$ , *amyE::P<sub>hy</sub>-yneA-safALysM*): PEB439 ( $\Delta yneA::loxP$ ) was transformed with plasmid pEM26.

**EAM82** (*amyE::P<sub>hy</sub>-yneA-safALysM*): PY79 was transformed with plasmid pEM26.

**EAM83** ( $\Delta ddcP$ ,  $\Delta yneA::loxP$ ,  $amyE::P_{hy}-yneA\Delta 5$ ): PEB441 ( $\Delta ddcP$ ,  $\Delta yneA::loxP$ ) was transformed with genomic DNA isolated from EAM53 ( $\Delta yneA::loxP$ ,  $amyE::P_{hy}-yneA\Delta 5$ ).

**EAM84** ( $\Delta ddcP$ ,  $\Delta yneA::loxP$ ,  $amyE::P_{hy}-yneA\Delta 10$ ): PEB441 ( $\Delta ddcP$ ,  $\Delta yneA::loxP$ ) was transformed with genomic DNA isolated from EAM54 ( $\Delta yneA::loxP$ ,  $amyE::P_{hy}-yneA\Delta 10$ ).

**EAM85** ( $\Delta ddcP$ ,  $\Delta yneA::loxP$ ,  $amyE::P_{hy}-yneA\Delta 15$ ): PEB441 ( $\Delta ddcP$ ,  $\Delta yneA::loxP$ ) was transformed with genomic DNA isolated from EAM55 ( $\Delta yneA::loxP$ ,  $amyE::P_{hy}-yneA\Delta 15$ ).

### **Individual plasmid construction**

**pEM1:** The ORF of *yneA* containing the V68A mutation was PCR amplified using oEAC20 and oPEB857 primers. pPB194 was PCR amplified using oPEB3F and oPEB259 primers. These two PCR products were used in a Gibson assembly reaction to generate a plasmid to integrate *yneA-V68A* under the control of  $P_{hy}$  at the *amyE* locus. Clones were verified by Sanger sequencing with oPEB866 and oPEB867.

**pEM2:** The ORF of *yneA* containing the G10D mutation was PCR amplified using oEAC20 and oPEB857 primers. pPB194 was PCR amplified using oPEB3F and oPEB259 primers. These two PCR products were used in a Gibson assembly reaction to generate a plasmid to integrate *yneA-G10D* under the control of  $P_{hy}$  at the *amyE* locus. Clones were verified by Sanger sequencing with oPEB866 and oPEB867.

**pEM4:** The ORF of *yneA* containing the G82S mutation was PCR amplified using oEAC20 and oPEB857 primers. pPB194 was PCR amplified using oPEB3F and oPEB259 primers. These two PCR products were used in a Gibson assembly reaction to generate a plasmid to integrate *yneA-G82S* under the control of  $P_{hy}$  at the *amyE* locus. Clones were verified by Sanger sequencing with oPEB866 and oPEB867.

**pEM5:** The ORF of *yneA* with a premature stop codon was PCR amplified using oEAC20 and oEAC21. pPB194 was PCR amplified using oPEB3F and oPEB259 primers. These two PCR products were used in a Gibson assembly reaction to generate a plasmid to integrate *yneA* $\Delta 5$  C-terminal truncation under the control of  $P_{hy}$  at the *amyE* locus. Clones were verified by Sanger sequencing with oPEB866 and oPEB867.

**pEM6:** The ORF of *yneA* with a premature stop codon was PCR amplified using oEAC20 and oEAC22. pPB194 was PCR amplified using oPEB3F and oPEB259 primers. These two PCR products were used in a Gibson assembly reaction to generate a plasmid to integrate *yneA* $\Delta 10$  C-terminal truncation under the control of  $P_{hy}$  at the *amyE* locus. Clones were verified by Sanger sequencing with oPEB866 and oPEB867.

**pEM7:** The ORF of *yneA* with a premature stop codon was PCR amplified using oEAC20 and oEAC23. pPB194 was PCR amplified using oPEB3F and oPEB259

primers. These two PCR products were used in a Gibson assembly reaction to generate a plasmid to integrate *yneA* $\Delta$ 15 C-terminal truncation under the control of P<sub>hy</sub> at the *amyE* locus. Clones were verified by Sanger sequencing with oPEB866 and oPEB867.

**pEM13:** The ORF of *ftsW* was PCR amplified using oEAM28 and oEAM29 primers. pPB194 was PCR amplified using oPEB3F and oPEB259 primers. These two PCR products were used in a Gibson assembly reaction to generate a plasmid to integrate *ftsW* under the control of P<sub>hy</sub> at the *amyE* locus. Clones were verified by Sanger sequencing with oPEB866 and oPEB867.

**pEM16:** DivIB was amplified with primers oEAM42/43 and the plasmid pKT25 was amplified with primers oPEB1014/1015. These two PCR products were used in a Gibson assembly reaction to generate T25-DivIB fusion for expression in BTH101 cells in a bacterial two-hybrid assay. Clones were selected on LB agar containing 50  $\mu$ g/mL kanamycin and 0.2% glucose. Clones were verified via Sanger sequencing using oPEB1021 and 1022.

**pEM17:** EzrA was amplified with primers oEAM44/45 and the plasmid pKT25 was amplified with primers oPEB1014/1015. These two PCR products were used in a Gibson assembly reaction to generate T25-EzrA fusion for expression in BTH101 cells in a bacterial two-hybrid assay. Clones were selected on LB agar containing 50  $\mu$ g/mL kanamycin and 0.2% glucose. Clones were verified via Sanger sequencing using oPEB1021 and 1022.

**pEM18:** SepF was amplified with primers oEAM46/47 and the plasmid pKT25 was amplified with primers oPEB1014/1015. These two PCR products were used in a Gibson assembly reaction to generate T25-SepF fusion for expression in BTH101 cells in a bacterial two-hybrid assay. Clones were selected on LB agar containing 50  $\mu$ g/mL kanamycin and 0.2% glucose. Clones were verified via Sanger sequencing using oPEB1021 and 1022.

**pEM19:** DivIC was amplified with primers oEAM48/49 and the plasmid pKT25 was amplified with primers oPEB1014/1015. These two PCR products were used in a Gibson assembly reaction to generate T25-DivIC fusion for expression in BTH101 cells in a bacterial two-hybrid assay. Clones were selected on LB agar containing 50  $\mu$ g/mL kanamycin and 0.2% glucose. Clones were verified via Sanger sequencing using oPEB1021 and 1022.

**pEM20:** FtsL was amplified with primers oEAM50/51 and the plasmid pKT25 was amplified with primers oPEB1014/1015. These two PCR products were used in a Gibson assembly reaction to generate T25-FtsL fusion for expression in BTH101 cells in a bacterial two-hybrid assay. Clones were selected on LB agar containing 50  $\mu$ g/mL kanamycin and 0.2% glucose. Clones were verified via Sanger sequencing using oPEB1021 and 1022.

**pEM21:** FtsW was amplified with primers oEAM52/53 and the plasmid pKT25 was amplified with primers oPEB1014/1015. These two PCR products were used in a Gibson assembly reaction to generate T25-FtsW fusion for expression in BTH101 cells in a bacterial two-hybrid assay. Clones were selected on LB agar containing 50 µg/mL kanamycin and 0.2% glucose. Clones were verified via Sanger sequencing using oPEB1021 and 1022.

**pEM22:** FtsW-L148P was amplified with primers oEAM52/53 and the plasmid pKT25 was amplified with primers oPEB1014/1015. These two PCR products were used in a Gibson assembly reaction to generate T25-FtsW-L148P fusion for expression in BTH101 cells in a bacterial two-hybrid assay. Clones were selected on LB agar containing 50 µg/mL kanamycin and 0.2% glucose. Clones were verified via Sanger sequencing using oPEB1021 and 1022.

**pEM23:** DivIVA was amplified with primers oEAM54/55 and the plasmid pKT25 was amplified with primers oPEB1014/1015. These two PCR products were used in a Gibson assembly reaction to generate T25-DivIVA fusion for expression in BTH101 cells in a bacterial two-hybrid assay. Clones were selected on LB agar containing 50 µg/mL kanamycin and 0.2% glucose. Clones were verified via Sanger sequencing using oPEB1021 and 1022.

**pEM24:** Pbp2b (*pbpB*) was amplified with primers oEAM56/57 and the plasmid pKT25 was amplified with primers oPEB1014/1015. These two PCR products were used in a Gibson assembly reaction to generate T25-PBP2B fusion for expression in BTH101 cells in a bacterial two-hybrid assay. Clones were selected on LB agar containing 50 µg/mL kanamycin and 0.2% glucose. Clones were verified via Sanger sequencing using oPEB1021 and 1022.

**pEM25:** FtsW-L148P was amplified with primers oPEB1096/1097 and the plasmid pUT18C was amplified using primers oPEB1017/1018. These two PCR products were used in a Gibson assembly reaction to generate a T18-FtsW-L148P fusion for expression in BTH101 cells in a bacterial two-hybrid assay. Clones were selected on LB agar containing 100 µg/mL ampicillin and 0.2% glucose. Clones were verified via Sanger sequencing using oPEB1024 and 1025.

**pEM26:** Gblock (IDT) was generated with the ORF of *yneA* with the *safA* LysM domain in place of the *yneA* LysM domain **while retaining the YneA C-terminal tail**. This Gblock was PCR amplified with oPEB856 and oPEB857 primers. pPB194 was PCR amplified using oPEB3F and oPEB259 primers. These two PCR products were used in a Gibson assembly reaction to generate a plasmid to integrate *yneA-safA-LysM* under the control of  $P_{hy}$  at the *amyE* locus. Clones were verified by Sanger sequencing with oPEB866 and oPEB867.

**pPB267:** YneA was amplified with primers oPEB1034/1035 and the plasmid pUT18C was amplified using primers oPEB1017/1018. These two PCR products were used in a Gibson assembly reaction to generate a T18-YneA fusion for expression in BTH101

cells in a bacterial two-hybrid assay. Clones were selected on LB agar containing 100 µg/mL ampicillin and 0.2% glucose. Clones were verified via Sanger sequencing using oPEB1024 and 1025.

**pPB271:** CtpA-S297A was amplified with primers oPEB1041/1042 and the plasmid pKT25 was amplified with primers oPEB1014/1015. These two PCR products were used in a Gibson assembly reaction to generate T25-CtpA-S297A fusion for expression in BTH101 cells in a bacterial two-hybrid assay. Clones were selected on LB agar containing 50 µg/mL kanamycin and 0.2% glucose. Clones were verified via Sanger sequencing using oPEB1021 and 1022.

**pPB304:** GpsB was amplified with primers oPEB1110/1111 and the plasmid pKT25 was amplified with primers oPEB1014/1015. These two PCR products were used in a Gibson assembly reaction to generate T25-GpsB fusion for expression in BTH101 cells in a bacterial two-hybrid assay. Clones were selected on LB agar containing 50 µg/mL kanamycin and 0.2% glucose. Clones were verified via Sanger sequencing using oPEB1021 and 1022.

**pPB305:** Pbp1 (*ponA*) was amplified with primers oPEB1112/1113 and the plasmid pKT25 was amplified with primers oPEB1014/1015. These two PCR products were used in a Gibson assembly reaction to generate T25-PBP1 fusion for expression in BTH101 cells in a bacterial two-hybrid assay. Clones were selected on LB agar containing 50 µg/mL kanamycin and 0.2% glucose. Clones were verified via Sanger sequencing using oPEB1021 and 1022.

**pPB275:** YneA was amplified with primers oPEB1058/1059 and the plasmid pKT25 was amplified with primers oPEB1014/1015. These two PCR products were used in a Gibson assembly reaction to generate T25-YneA fusion for expression in BTH101 cells in a bacterial two-hybrid assay. Clones were selected on LB agar containing 50 µg/mL kanamycin and 0.2% glucose. Clones were verified via Sanger sequencing using oPEB1021 and 1022.

**pPB291:** DivIB was amplified with primers oPEB1070/1071 and the plasmid pUT18C was amplified using primers oPEB1017/1018. These two PCR products were used in a Gibson assembly reaction to generate a T18-DivIB fusion for expression in BTH101 cells in a bacterial two-hybrid assay. Clones were selected on LB agar containing 100 µg/mL ampicillin and 0.2% glucose. Clones were verified via Sanger sequencing using oPEB1024 and 1025.

**pPB292:** EzrA was amplified with primers oPEB1072/1073 and the plasmid pUT18C was amplified using primers oPEB1017/1018. These two PCR products were used in a Gibson assembly reaction to generate a T18-EzrA fusion for expression in BTH101 cells in a bacterial two-hybrid assay. Clones were selected on LB agar containing 100 µg/mL ampicillin and 0.2% glucose. Clones were verified via Sanger sequencing using oPEB1024 and 1025.

**pPB293:** SepF was amplified with primers oPEB1074/1075 and the plasmid pUT18C was amplified using primers oPEB1017/1018. These two PCR products were used in a Gibson assembly reaction to generate a T18-SepF fusion for expression in BTH101 cells in a bacterial two-hybrid assay. Clones were selected on LB agar containing 100 µg/mL ampicillin and 0.2% glucose. Clones were verified via Sanger sequencing using oPEB1024 and 1025.

**pPB296:** DivIC was amplified with primers oPEB1092/1093 and the plasmid pUT18C was amplified using primers oPEB1017/1018. These two PCR products were used in a Gibson assembly reaction to generate a T18-DivIC fusion for expression in BTH101 cells in a bacterial two-hybrid assay. Clones were selected on LB agar containing 100 µg/mL ampicillin and 0.2% glucose. Clones were verified via Sanger sequencing using oPEB1024 and 1025.

**pPB297:** FtsL was amplified with primers oPEB1094/1095 and the plasmid pUT18C was amplified using primers oPEB1017/1018. These two PCR products were used in a Gibson assembly reaction to generate a T18-FtsL fusion for expression in BTH101 cells in a bacterial two-hybrid assay. Clones were selected on LB agar containing 100 µg/mL ampicillin and 0.2% glucose. Clones were verified via Sanger sequencing using oPEB1024 and 1025.

**pPB298:** FtsW was amplified with primers oPEB1096/1097 and the plasmid pUT18C was amplified using primers oPEB1017/1018. These two PCR products were used in a Gibson assembly reaction to generate a T18-FtsW fusion for expression in BTH101 cells in a bacterial two-hybrid assay. Clones were selected on LB agar containing 100 µg/mL ampicillin and 0.2% glucose. Clones were verified via Sanger sequencing using oPEB1024 and 1025.

**pPB299:** DivIVA was amplified with primers oPEB1098/1099 and the plasmid pUT18C was amplified using primers oPEB1017/1018. These two PCR products were used in a Gibson assembly reaction to generate a T18-DivIVA fusion for expression in BTH101 cells in a bacterial two-hybrid assay. Clones were selected on LB agar containing 100 µg/mL ampicillin and 0.2% glucose. Clones were verified via Sanger sequencing using oPEB1024 and 1025.

**pPB300:** Pbp2b (*pbpB*) was amplified with primers oPEB1100/1101 and the plasmid pUT18C was amplified using primers oPEB1017/1018. These two PCR products were used in a Gibson assembly reaction to generate a T18-PBP2B fusion for expression in BTH101 cells in a bacterial two-hybrid assay. Clones were selected on LB agar containing 100 µg/mL ampicillin and 0.2% glucose. Clones were verified via Sanger sequencing using oPEB1024 and 1025.

**pPB301:** Pbp1 (*ponA*) was amplified with primers oPEB1102/1103 and the plasmid pUT18C was amplified using primers oPEB1017/1018. These two PCR products were used in a Gibson assembly reaction to generate a T18-PBP1 fusion for expression in BTH101 cells in a bacterial two-hybrid assay. Clones were selected on LB agar

containing 100 µg/mL ampicillin and 0.2% glucose. Clones were verified via Sanger sequencing using oPEB1024 and 1025.

**pPB302:** GpsB was amplified with primers oPEB1104/1105 and the plasmid pUT18C was amplified using primers oPEB1017/1018. These two PCR products were used in a Gibson assembly reaction to generate a T18-GpsB fusion for expression in BTH101 cells in a bacterial two-hybrid assay. Clones were selected on LB agar containing 100 µg/mL ampicillin and 0.2% glucose. Clones were verified via Sanger sequencing using oPEB1024 and 1025.

**pPB303:** CtpA-S297A was amplified with primers oPEB1108/1109 and using pPB185 as a template. The plasmid pUT18C was amplified using primers oPEB1017/1018. These two PCR products were used in a Gibson assembly reaction to generate a T18-CtpA-S297A fusion for expression in BTH101 cells in a bacterial two-hybrid assay. Clones were selected on LB agar containing 100 µg/mL ampicillin and 0.2% glucose. Clones were verified via Sanger sequencing using oPEB833, 1024 and 1025.

## References

Burby, P. E., Z. W. Simmons, J. W. Schroeder and L. A. Simmons (2018). "Discovery of a dual protease mechanism that promotes DNA damage checkpoint recovery." PLoS Genet **14**(7): e1007512.

Burby, P. E., Z. W. Simmons and L. A. Simmons (2019). "DdcA antagonizes a bacterial DNA damage checkpoint." Mol Microbiol **111**(1): 237-253.

Youngman, P., J. B. Perkins and R. Losick (1984). "Construction of a cloning site near one end of Tn917 into which foreign DNA may be inserted without affecting transposition in *Bacillus subtilis* or expression of the transposon-borne *erm* gene." Plasmid **12**(1): 1-9.
